# Supplementary material
Source: PubMed Central journal article supplement (PMC7611045)
Supplement: EMS120222-supplement-Supplementary_Table_6.pdf [file EMS120222-supplement-Supplementary_Table_6.pdf]

| Variables              | Weight |
|------------------------|--------|
| $E_{\text{MMRD}}$      | -42.95 |
| $S_{\text{sub}}$       | -14.53 |
| $N_{\text{rep.indel}}$ | -2.96  |
| $S_{\text{rep.del}}$   | -4.62  |
| $\beta_0$              | 16.04  |

Table S6. Weights for the variables used in MMRDetect. These weights were obtained by training the classifier using 180 MMR-proficient and 56 MMR-deficient colorectal cancers.
